# Supplementary material
Source: Springer Nature journal article supplement (https://www.springermedizin.de/resource/supplementary/12943_2011_934_MOESM1_ESM.pdf/9551710)

**A.****Normal bile duct****CCA**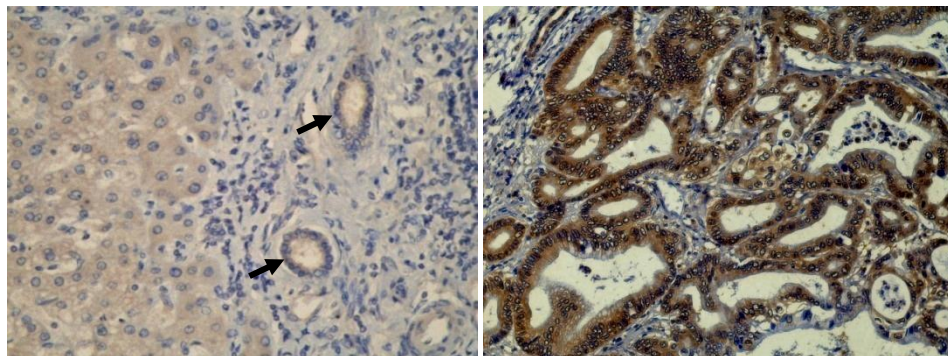**C.**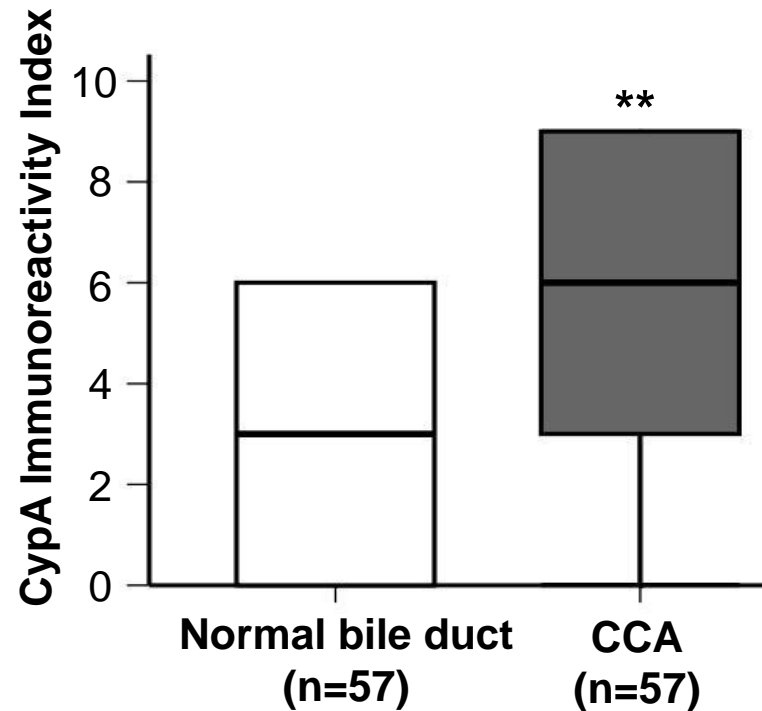**B.**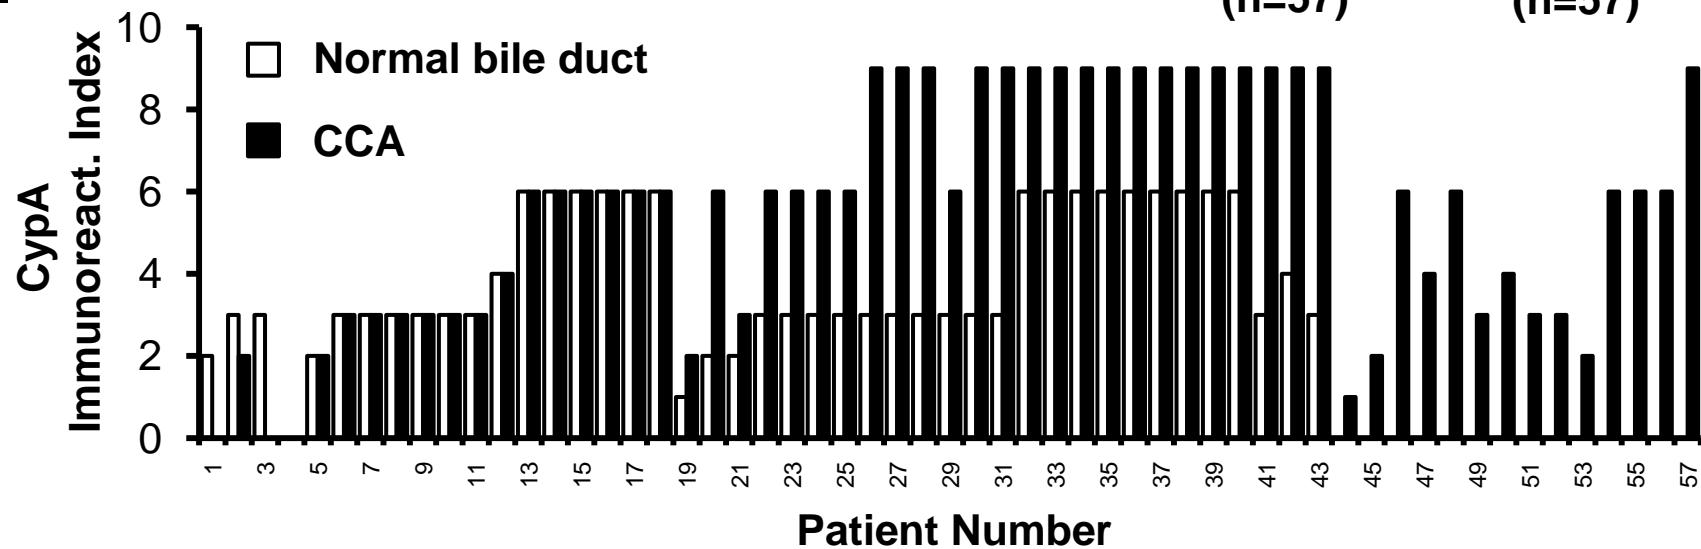

Supplement: MOESM1 [file 9551710]
